# Supplementary material
Source: PubMed Central journal article supplement (PMC5135441)
Supplement: thnov06p2170s1.pdf [file thnov06p2170s1.pdf]

## Supplementary Information for

# **Versatile pH-response Micelles with High Cell-Penetrating Helical Diblock Copolymers for Photoacoustic Imaging Guided Synergistic Chemo-Photothermal Therapy**

Shengyu Shi, Yajing Liu, Yu Chen, Zhihuang Zhang, Yunsheng Ding, Zongquan Wu, Jun Yin\*, and  
Liming Nie\*

S. Y. Shi, Z. P. Yu, Z. H. Zhang, Prof. Y. S. Ding, Prof. J. Yin, Prof. Z. Q. Wu

Department of Polymer Science and Engineering, School of Chemistry and Chemical Engineering,  
Hefei University of Technology and Anhui Key Laboratory of Advanced Functional Materials and  
Devices, Hefei, 230009, China.

E-mail: yinjun@hfut.edu.cn

Dr. Y. Liu, Prof. L. Nie

State Key Laboratory of Molecular Vaccinology and Molecular Diagnostics & Center for Molecular  
Imaging and Translational Medicine, School of Public Health, Xiamen University, Xiamen, 361102,  
China.

E-mail: nielm@xmu.edu.cn

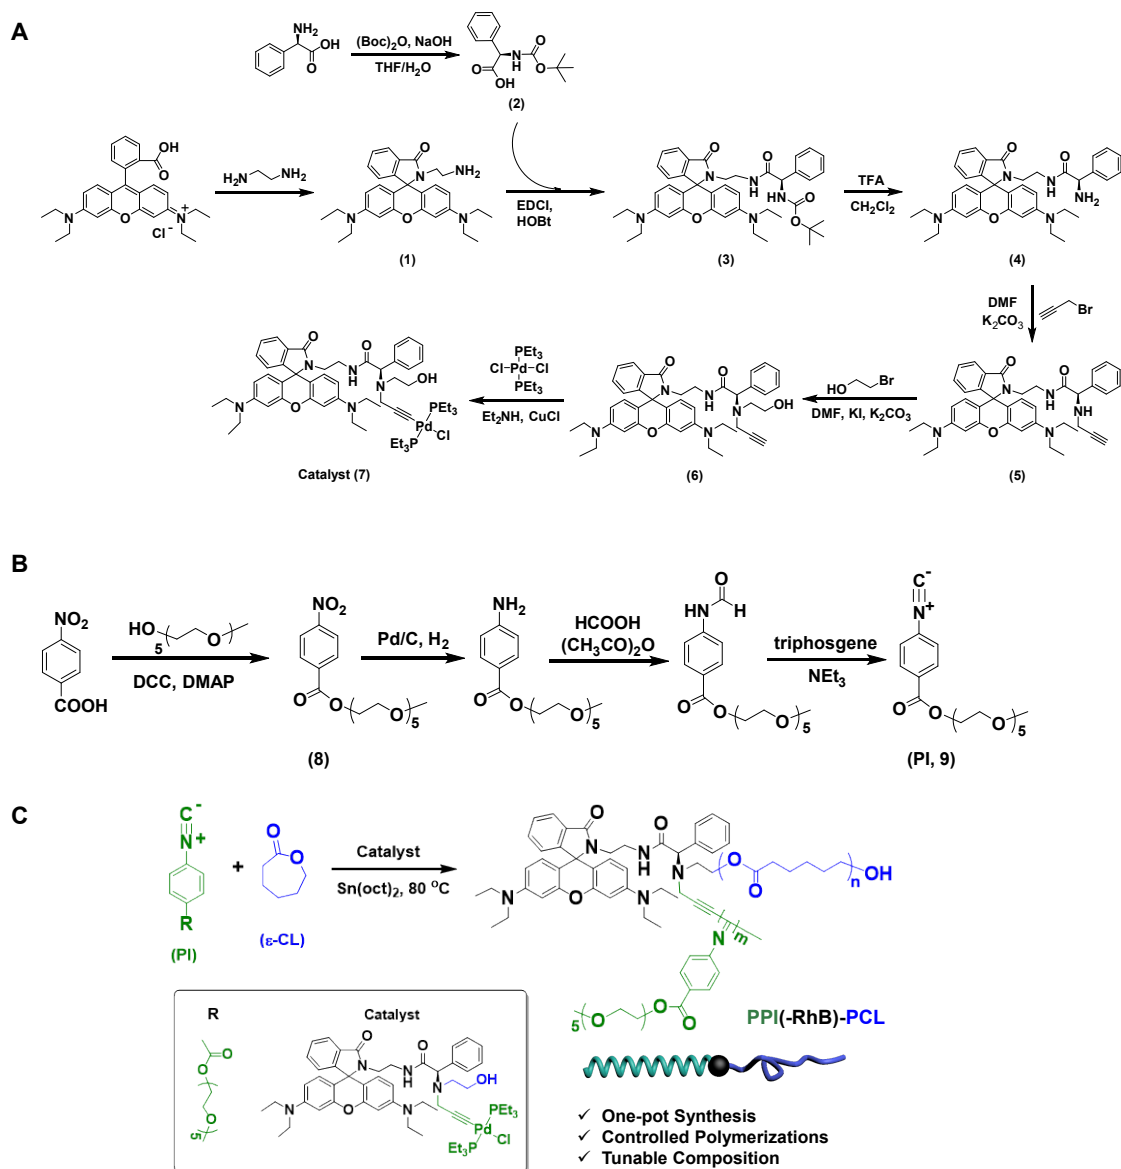

**Scheme S1.** Synthetic routes employed for the preparation of (A) bifunctional catalyst,  $\text{ClPd}(\text{PEt}_3)_2\text{-RhB-OH}$ , (B) PI, and (C) the “one-pot” copolymerization of PEGylated phenyl isocyanide monomers (PI; 9) and  $\epsilon$ -caprolactone ( $\epsilon$ -CL) by two mechanistically distinctive living polymerizations with  $\text{ClPd}(\text{PEt}_3)_2\text{-RhB-OH}$  as an initiator.

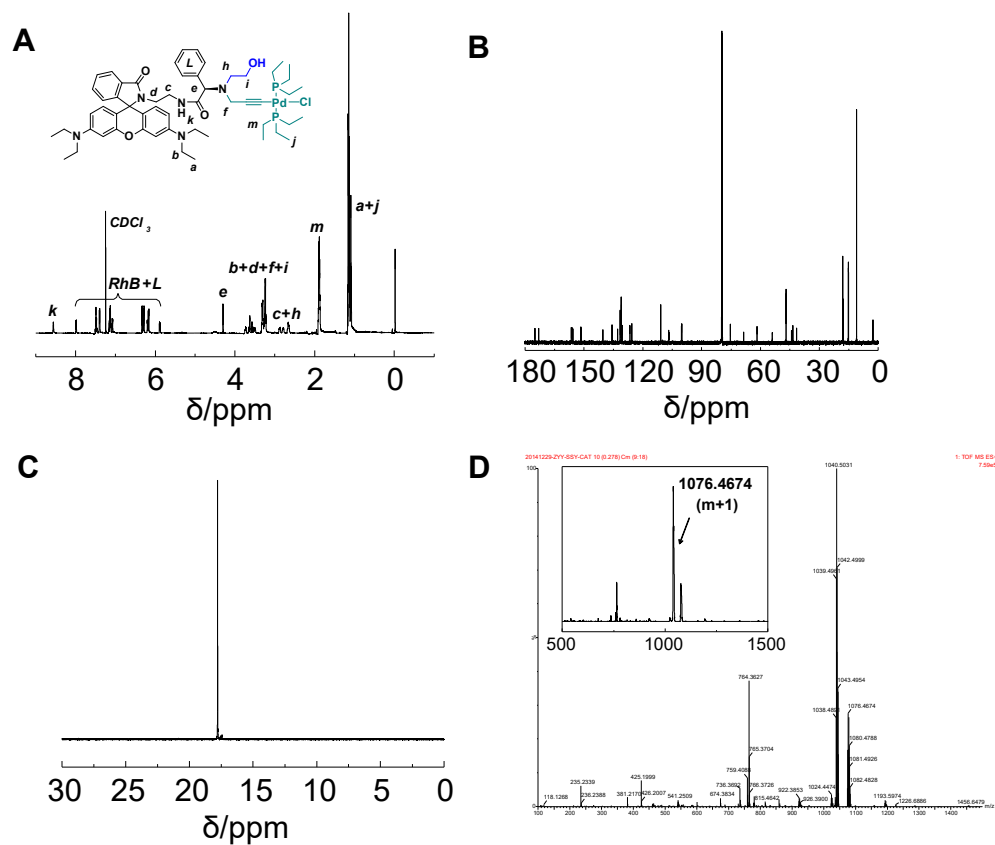

**Figure S1.** (A)  $^1\text{H}$ , (B)  $^{13}\text{C}$ , (C)  $^{31}\text{P}$  NMR (600 MHz,  $\text{CDCl}_3$ , 25 °C), (D) mass spectra and obtained for the bifunctional catalyst  $\text{ClPd}(\text{PEt}_3)_2\text{-RhB-OH}$ .

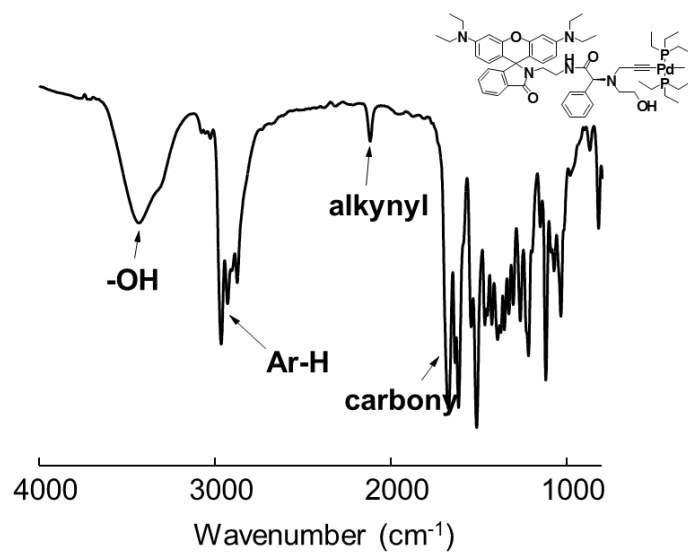

**Figure S2** FT-IR spectrum of palladium(II) modified complex (7) measured at 25 °C using KBr pellets.

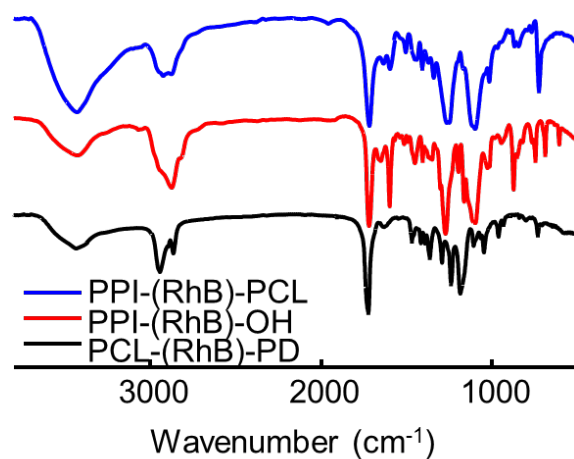

**Figure S3.** FT-IR spectra of PCL(-RhB)-Pd(PEt<sub>3</sub>)<sub>2</sub>Cl, PPI(-RhB)-OH, and PPI(-RhB)-PCL measured at 25 °C using KBr pellets.

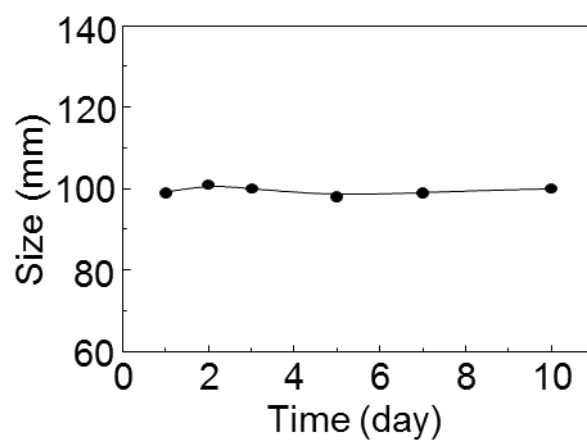

**Figure S4.** Size variation of ICM in water at 25 °C during 10 days of storage.

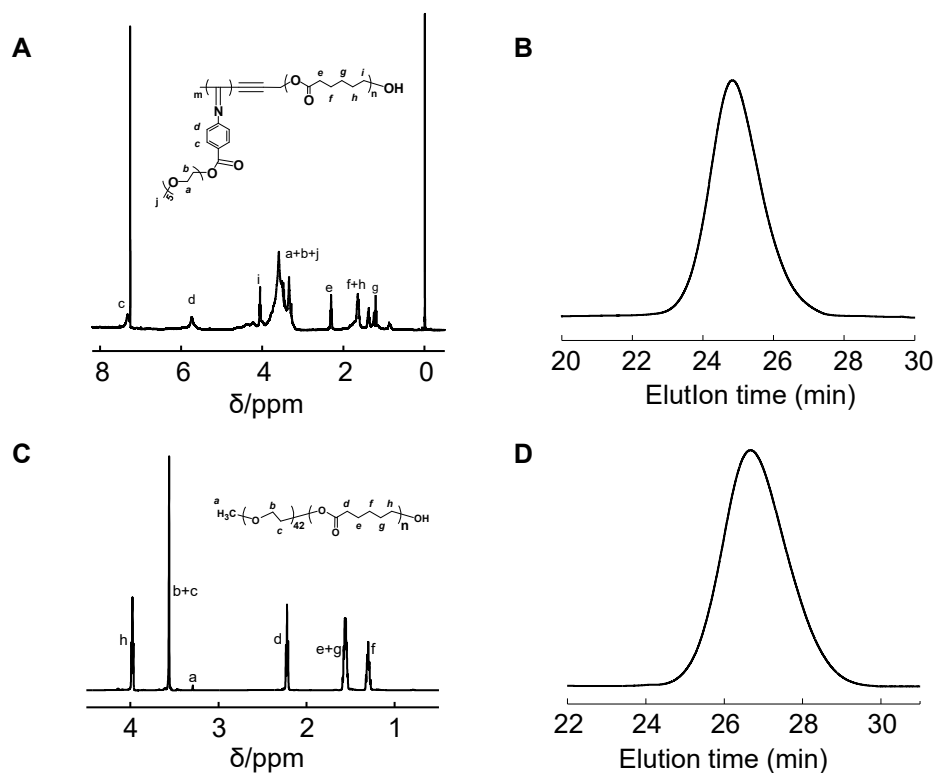

**Figure S5.** (A)  $^1\text{H}$  NMR spectrum of PPI-PCL measured in  $\text{CDCl}_3$  at  $25^\circ\text{C}$  (600 MHz). (B) SEC trace obtained for PPI-PCL, using THF as eluent. (C)  $^1\text{H}$  NMR spectrum of mPEG-PCL measured in  $\text{CDCl}_3$  at  $25^\circ\text{C}$  (600 MHz). (D) SEC trace obtained for mPEG-PCL, using THF as eluent.

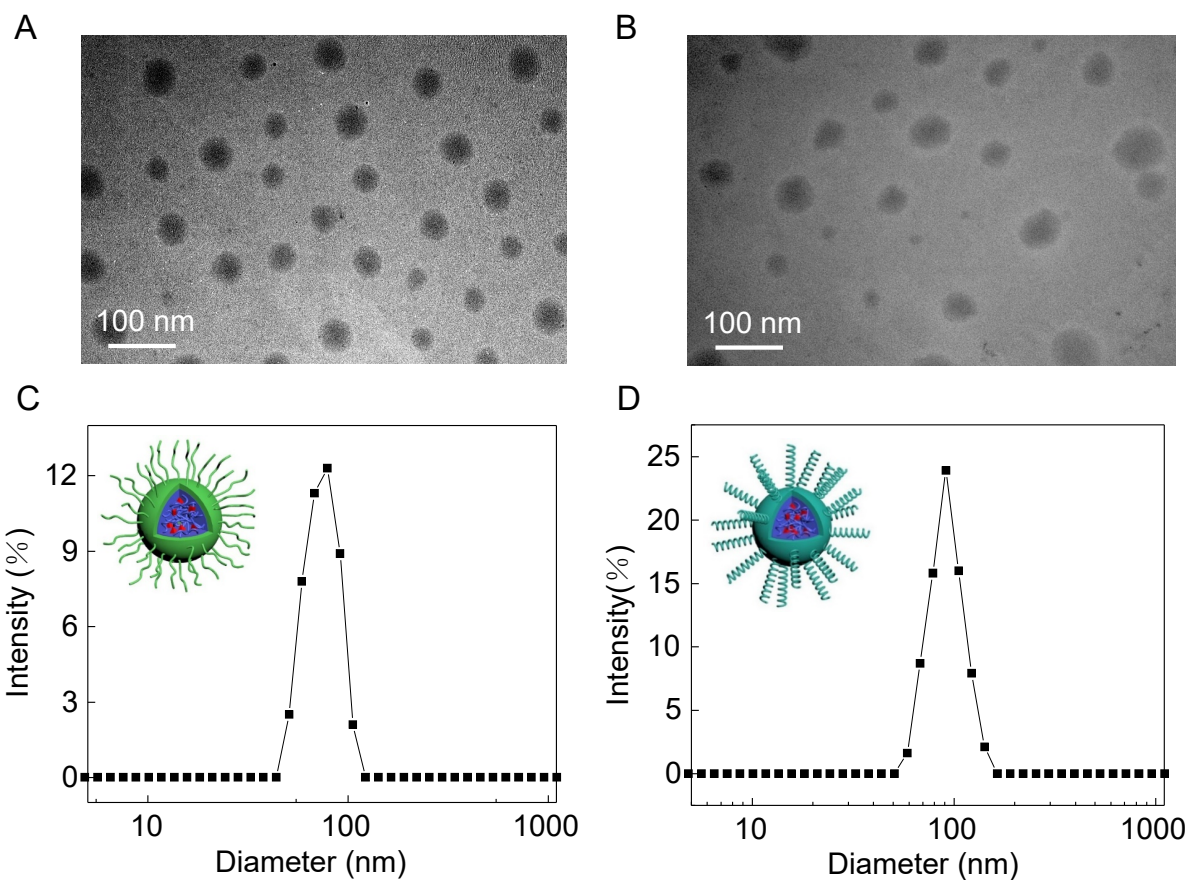

**Figure S6.** TEM images observed for (A) Nile red@mPEG-PCL and (B) Nile red@PPI-PCL micelles dried from aqueous dispersions. DLS spectra obtained for (C) Nile red@mPEG-PCL and (D) Nile red@PPI-PCL micelles in water. All the concentration were fixed at 0.5 g/L.

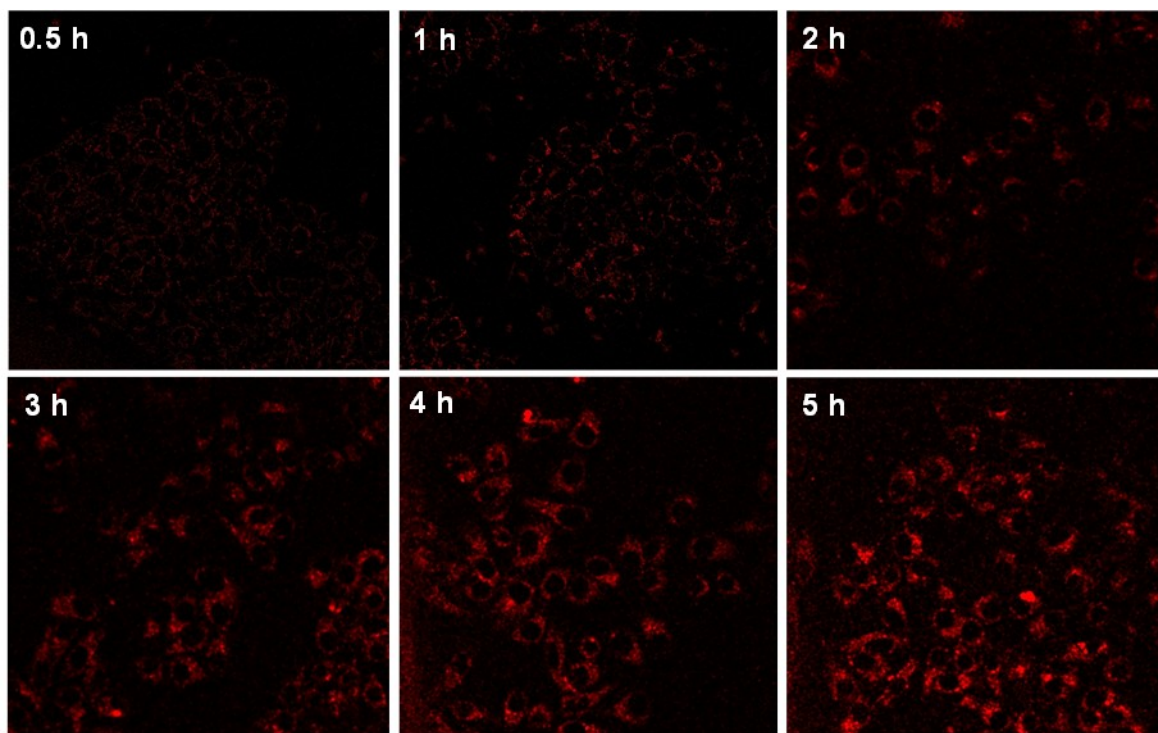

**Figure S7.** Incubation duration-dependent CLSM images of live HeLa cells when culturing at 37 °C with ICM (1.0 g/L). The red channel was excited at 543 nm and collected between 555 and 600 nm.



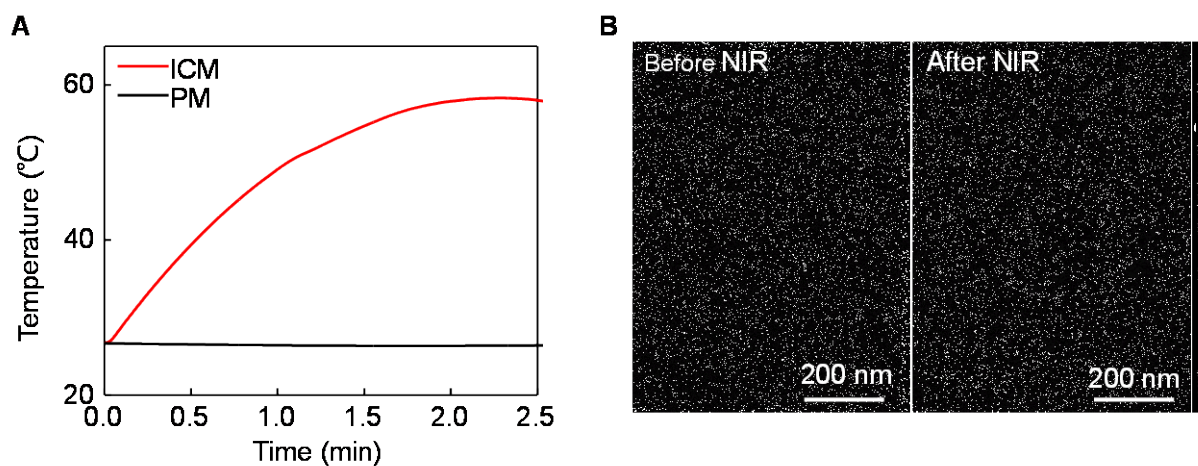

**Figure S8.** (A) Temperature change of ICM and PM as a function of irradiation time. Both of the concentrations were fixed at 1.0 g/L. (B) SEM images observed for the morphologies of ICM before and 10 min after NIR irradiation.

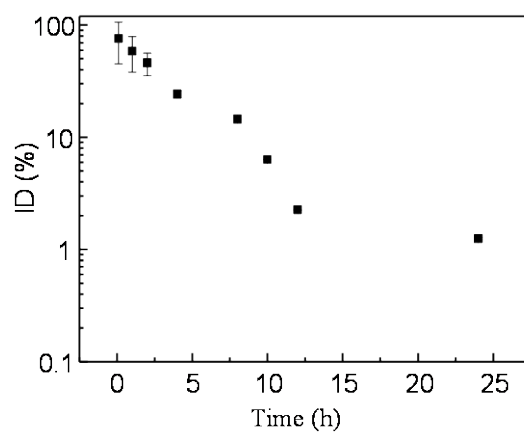

**Figure S9.** Plasma drug concentration versus time after intravenous injection of ICM

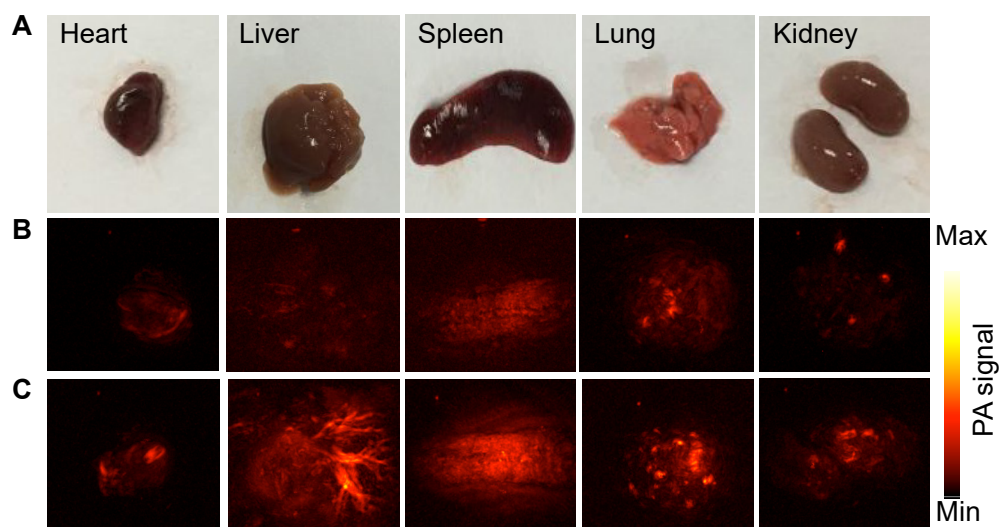

**Figure S10.** *Ex vivo* PA imaging of the main mouse organs before and 24 h after intravenous injection of ICM. (A) Photographs of main mouse organs (heart, liver, spleen, lung, kidney). PA images of main mouse tissues (B) before and (C) 24 h after intravenous injection of ICM.

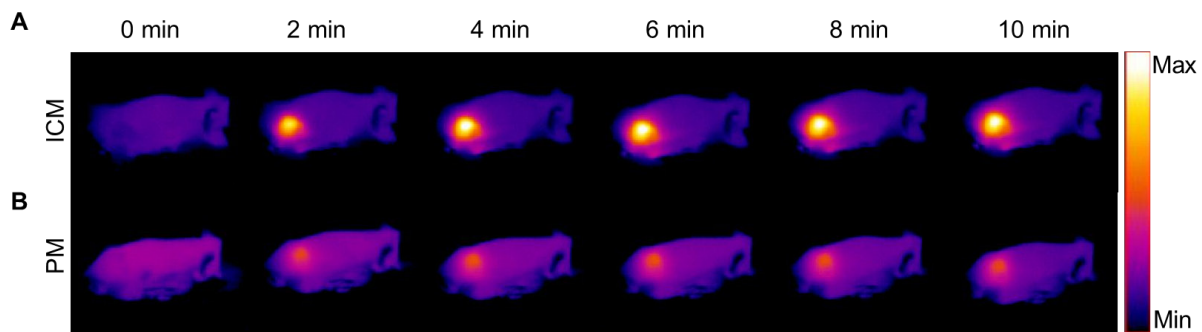

**Figure S11.** *In vivo* NIR thermal images obtained 24 h after intravenous injection of (A) ICM or (B) PM into mice and irradiated by 808 nm laser at power density of  $1 \text{ W cm}^{-2}$  as a function of irradiation time.

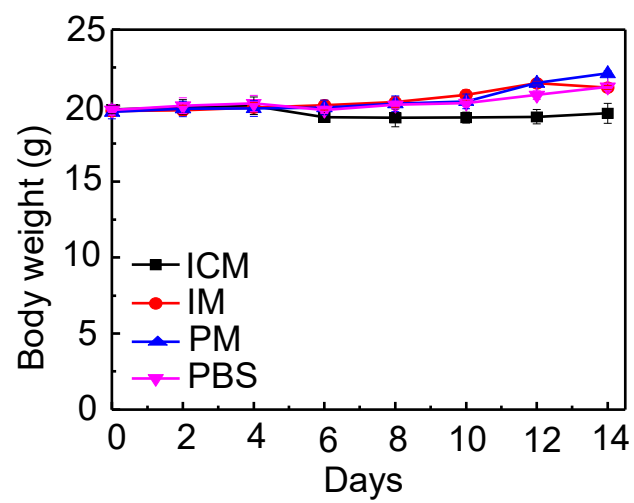

**Figure S12.** Body weight curves of tumor-bearing mice after 808 nm laser irradiation.

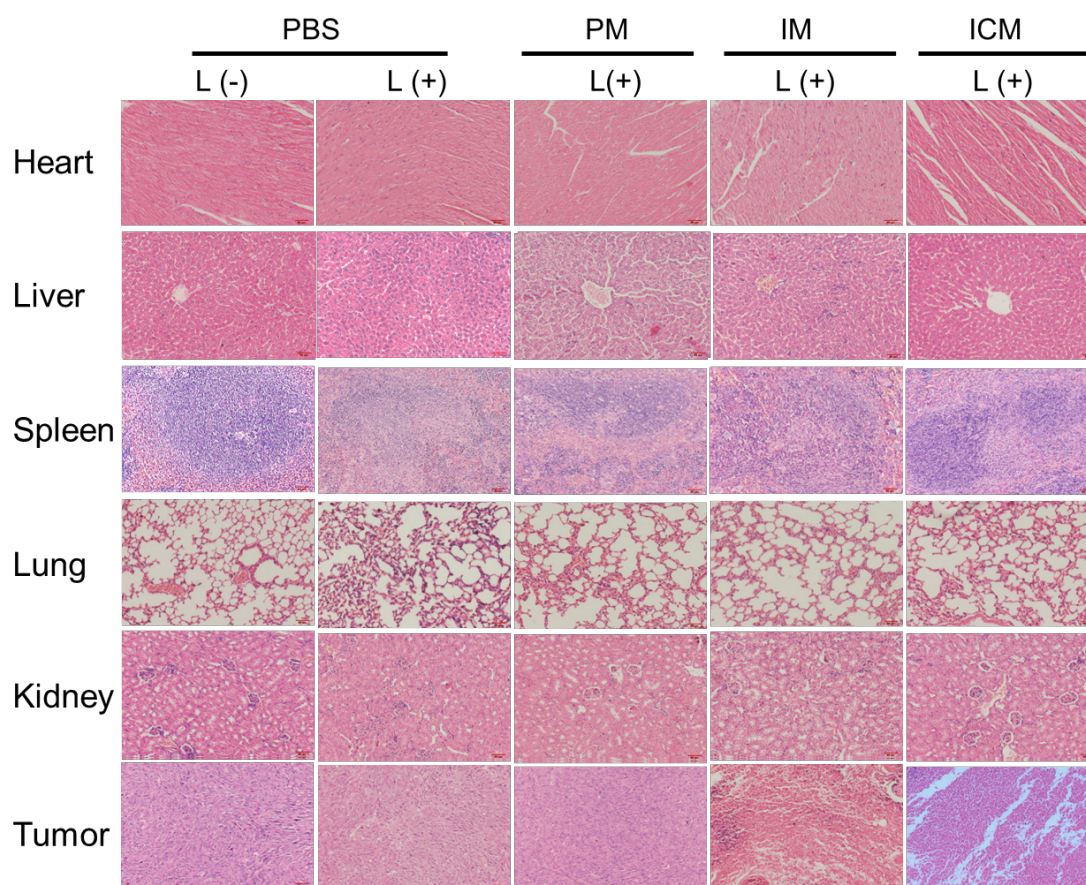

**Figure S13.** Hematoxylin and eosin (H&E)-stained slices of the heart, liver, spleen, lung, kidney, and tumor in mouse after treated by 808 nm laser at power density of  $1 \text{ W cm}^{-2}$  for 10 min.
